# Supplementary material for: A restructured and updated global soil respiration database (SRDB-V5)
Source: Copernicus journal article supplement (doi:10.5194/essd-13-255-2021), 2021-02-03
Supplement: Supplementary file 1 [file essd-13-255-2021-supplement.zip]

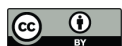

## *Supplement of*

# **A restructured and updated global soil respiration database (SRDB-V5)**

**Jinshi Jian et al.**

*Correspondence to:* Jinshi Jian ([jinshi@vt.edu](mailto:jinshi@vt.edu)) and Ben Bond-Lamberty ([bondlamberty@pnnl.gov](mailto:bondlamberty@pnnl.gov))

- [essd-13-255-2021-supplement-title-page.pdf](#)
- [FigureS1.MAT.jpg](#)
- [FigureS2.MAP.jpg](#)

The copyright of individual parts of the supplement might differ from the CC BY 4.0 License.
